# Supplementary material for: Unidirectional animal-to-human transmission of methicillin-resistant Staphylococcus aureus ST398 in pig farming; evidence from a surveillance study in southern Italy
Source: PubMed Central journal article supplement (PMC6873530; doi:10.1186/s13756-019-0650-z), 2019-11-21
Supplement: 13756_2019_650_MOESM1_ESM.pdf [file 13756_2019_650_MOESM1_ESM.pdf]

**Table S1.** Characteristics of swine farm workers

| Sample ID | Farm ID | Sex | Age | Nationality   | Employment         | Direct contact with swine | <i>S. aureus</i> nasal carriage | MRSA nasal carriage |
|-----------|---------|-----|-----|---------------|--------------------|---------------------------|---------------------------------|---------------------|
| 01CZ001U  | 01CZ    | M   | 55  | Italy         | Farm worker        | Yes                       | Yes                             | Yes                 |
| 01CZ002U  | 01CZ    | M   | 35  | Côte d'Ivoire | Farm worker        | Yes                       | Yes                             | No                  |
| 01CZ003U  | 01CZ    | M   | 49  | Italy         | Farm worker        | Yes                       | Yes                             | Yes                 |
| 01CZ004U  | 01CZ    | M   | 40  | Italy         | Other <sup>a</sup> | No                        | No                              | No                  |
| 01CZ005U  | 01CZ    | M   | 84  | Italy         | Other <sup>a</sup> | No                        | No                              | No                  |
| 02CZ001U  | 02CZ    | M   | 39  | Italy         | Farm worker        | Yes                       | Yes                             | Yes                 |
| 02CZ002U  | 02CZ    | F   | 36  | Italy         | Other <sup>a</sup> | No                        | No                              | No                  |
| 02CZ003U  | 02CZ    | M   | 39  | Romania       | Farm worker        | Yes                       | Yes                             | Yes                 |
| 03CZ001U  | 03CZ    | M   | 31  | Italy         | Farm worker        | Yes                       | Yes                             | Yes                 |
| 03CZ002U  | 03CZ    | M   | 48  | Italy         | Farm worker        | Yes                       | No                              | No                  |
| 04CZ001U  | 04CZ    | F   | 79  | Italy         | Other <sup>a</sup> | No                        | No                              | No                  |
| 04CZ002U  | 04CZ    | F   | 53  | Italy         | Farm worker        | Yes                       | Yes                             | No                  |
| 04CZ003U  | 04CZ    | M   | 51  | Italy         | Farm worker        | Yes                       | Yes                             | No                  |
| 04CZ004U  | 04CZ    | M   | 21  | Italy         | Farm worker        | Yes                       | Yes                             | No                  |
| 04CZ005U  | 04CZ    | M   | 49  | Italy         | Farm worker        | Yes                       | Yes                             | No                  |
| 04CZ006U  | 04CZ    | M   | 45  | Italy         | Farm worker        | Yes                       | No                              | No                  |
| 05CS001U  | 05CS    | M   | 54  | Italy         | Farm worker        | Yes                       | Yes                             | No                  |
| 05CS002U  | 05CS    | M   | 57  | Italy         | Farm worker        | Yes                       | No                              | No                  |
| 05CS003U  | 05CS    | M   | 46  | Italy         | Farm worker        | Yes                       | Yes                             | Yes                 |
| 05CS004U  | 05CS    | M   | 47  | Italy         | Farm worker        | Yes                       | Yes                             | Yes                 |
| 05CS005U  | 05CS    | M   | 46  | Italy         | Farm worker        | Yes                       | Yes                             | No                  |
| 06CS001U  | 06CS    | M   | 58  | Italy         | Veterinarian       | Yes                       | No                              | No                  |
| 06CS002U  | 06CS    | M   | 46  | Italy         | Farm worker        | Yes                       | Yes                             | No                  |
| 07KR001U  | 07KR    | M   | 51  | Italy         | Farm worker        | Yes                       | No                              | No                  |
| 07KR002U  | 07KR    | M   | 40  | Italy         | Farm worker        | Yes                       | No                              | No                  |
| 07KR003U  | 07KR    | M   | 21  | Italy         | Farm worker        | Yes                       | Yes                             | No                  |
| 07KR004U  | 07KR    | M   | 21  | Italy         | Farm worker        | Yes                       | Yes                             | No                  |
| 07KR005U  | 07KR    | M   | 49  | Italy         | Veterinarian       | Yes                       | Yes                             | Yes                 |
| 08CZ001U  | 08CZ    | M   | 49  | Italy         | Farm worker        | Yes                       | No                              | No                  |
| 08CZ002U  | 08CZ    | M   | 44  | Italy         | Other <sup>a</sup> | No                        | Yes                             | No                  |
| 08CZ003U  | 08CZ    | M   | 43  | Italy         | Other <sup>a</sup> | No                        | No                              | No                  |
| 08CZ004U  | 08CZ    | M   | 33  | Italy         | Farm worker        | Yes                       | No                              | No                  |
| 08CZ005U  | 08CZ    | M   | 57  | Italy         | Farm worker        | Yes                       | Yes                             | No                  |
| 08CZ006U  | 08CZ    | M   | 45  | Italy         | Farm worker        | Yes                       | Yes                             | No                  |
| 09CZ001U  | 09CZ    | M   | 61  | Italy         | Farm worker        | Yes                       | Yes                             | No                  |
| 10RC001U  | 10RC    | M   | 57  | India         | Farm worker        | Yes                       | Yes                             | No                  |
| 10RC002U  | 10RC    | M   | 66  | Italy         | Other <sup>a</sup> | No                        | No                              | No                  |
| 11RC001U  | 11RC    | M   | 26  | Italy         | Farm worker        | Yes                       | Yes                             | Yes                 |
| 11RC002U  | 11RC    | M   | 62  | Italy         | Farm worker        | Yes                       | No                              | No                  |
| 12RC001U  | 12RC    | M   | 50  | Italy         | Farm worker        | Yes                       | Yes                             | No                  |
| 12RC002U  | 12RC    | M   | 34  | Italy         | Other <sup>a</sup> | No                        | No                              | No                  |
| 13CZ001U  | 13CZ    | M   | 58  | Italy         | Farm worker        | Yes                       | No                              | No                  |
| 13CZ002U  | 13CZ    | F   | 57  | Italy         | Other <sup>a</sup> | No                        | No                              | No                  |
| 13CZ003U  | 13CZ    | F   | 28  | Italy         | Other <sup>a</sup> | No                        | No                              | No                  |
| 14CZ001U  | 14CZ    | M   | 61  | Italy         | Farm worker        | Yes                       | No                              | No                  |
| 14CZ002U  | 14CZ    | F   | 62  | Italy         | Farm worker        | Yes                       | No                              | No                  |

|          |      |   |    |             |                    |     |     |     |
|----------|------|---|----|-------------|--------------------|-----|-----|-----|
| 15CZ001U | 15CZ | F | 33 | Italy       | Farm worker        | Yes | No  | No  |
| 15CZ002U | 15CZ | M | 44 | Italy       | Farm worker        | Yes | No  | No  |
| 16CS001U | 16CS | M | 42 | Italy       | Farm worker        | Yes | Yes | No  |
| 16CS002U | 16CS | M | 46 | Romania     | Farm worker        | Yes | Yes | No  |
| 16CS003U | 16CS | M | 42 | Italy       | Veterinarian       | Yes | No  | No  |
| 16CS004U | 16CS | M | 61 | Italy       | Veterinarian       | Yes | No  | No  |
| 17CS001U | 17CS | M | 60 | Italy       | Farm worker        | Yes | Yes | No  |
| 17CS002U | 17CS | F | 40 | Italy       | Other <sup>a</sup> | No  | No  | No  |
| 17CS003U | 17CS | M | 59 | Albania     | Farm worker        | Yes | Yes | No  |
| 18CS001U | 18CS | M | 38 | Italy       | Farm worker        | Yes | Yes | Yes |
| 18CS002U | 18CS | M | 49 | Italy       | Farm worker        | Yes | Yes | Yes |
| 18CS003U | 18CS | M | 32 | Italy       | Farm worker        | Yes | Yes | Yes |
| 19RC001U | 19RC | M | 38 | Italy       | Farm worker        | Yes | Yes | Yes |
| 19RC002U | 19RC | M | 33 | Italy       | Farm worker        | Yes | Yes | Yes |
| 20RC001U | 20RC | M | 33 | Italy       | Other <sup>a</sup> | No  | No  | No  |
| 20RC002U | 20RC | M | 41 | Italy       | Other <sup>a</sup> | No  | No  | No  |
| 20RC003U | 20RC | M | 40 | India       | Farm worker        | Yes | Yes | No  |
| 20RC004U | 20RC | M | 59 | Italy       | Farm worker        | Yes | No  | No  |
| 21RC001U | 21RC | M | 45 | India       | Farm worker        | Yes | Yes | Yes |
| 21RC002U | 21RC | M | 90 | Italy       | Other <sup>a</sup> | No  | No  | No  |
| 21RC003U | 21RC | M | 61 | Italy       | Veterinarian       | Yes | Yes | Yes |
| 21RC004U | 21RC | M | 60 | Italy       | Veterinarian       | Yes | Yes | No  |
| 22CZ001U | 22CZ | M | 24 | Italy       | Farm worker        | Yes | No  | No  |
| 23CZ001U | 23CZ | M | 46 | Switzerland | Farm worker        | Yes | No  | No  |
| 24KR001U | 24KR | M | 24 | Italy       | Farm worker        | Yes | Yes | No  |
| 24KR002U | 24KR | M | 51 | Italy       | Farm worker        | Yes | Yes | No  |
| 24KR003U | 24KR | M | 41 | Italy       | Farm worker        | Yes | No  | No  |
| 25KR001U | 25KR | M | 50 | Romania     | Farm worker        | Yes | Yes | No  |
| 25KR002U | 25KR | M | 64 | Italy       | Veterinarian       | Yes | No  | No  |
| 26VV001U | 26VV | M | 38 | Romania     | Farm worker        | Yes | No  | No  |
| 26VV002U | 26VV | M | 31 | Italy       | Farm worker        | Yes | No  | No  |
| 27VV001U | 27VV | M | 52 | Italy       | Other <sup>a</sup> | No  | No  | No  |
| 27VV002U | 27VV | M | 41 | Italy       | Farm worker        | Yes | No  | No  |
| 28VV001U | 28VV | M | 47 | Italy       | Farm worker        | Yes | Yes | No  |
| 29RC001U | 29RC | F | 31 | Italy       | Farm worker        | Yes | Yes | No  |
| 29RC002U | 29RC | M | 35 | Italy       | Farm worker        | Yes | Yes | Yes |
| 29RC003U | 29RC | F | 33 | Italy       | Farm worker        | Yes | Yes | Yes |
| 30RC001U | 30RC | F | 58 | Italy       | Farm worker        | Yes | Yes | No  |
| 31RC001U | 31RC | M | 25 | Italy       | Farm worker        | Yes | Yes | No  |
| 31RC002U | 31RC | M | 58 | Italy       | Veterinarian       | Yes | Yes | No  |
| 32RC001U | 32RC | M | 32 | Ukraine     | Farm worker        | Yes | Yes | Yes |
| 32RC002U | 32RC | M | 37 | Italy       | Farm worker        | Yes | No  | No  |

<sup>a</sup>Household member or external farm employee
