# Supplementary material for: Unidirectional animal-to-human transmission of methicillin-resistant Staphylococcus aureus ST398 in pig farming; evidence from a surveillance study in southern Italy
Source: PubMed Central journal article supplement (PMC6873530; doi:10.1186/s13756-019-0650-z), 2019-11-21
Supplement: 13756_2019_650_MOESM4_ESM.pdf [file 13756_2019_650_MOESM4_ESM.pdf]

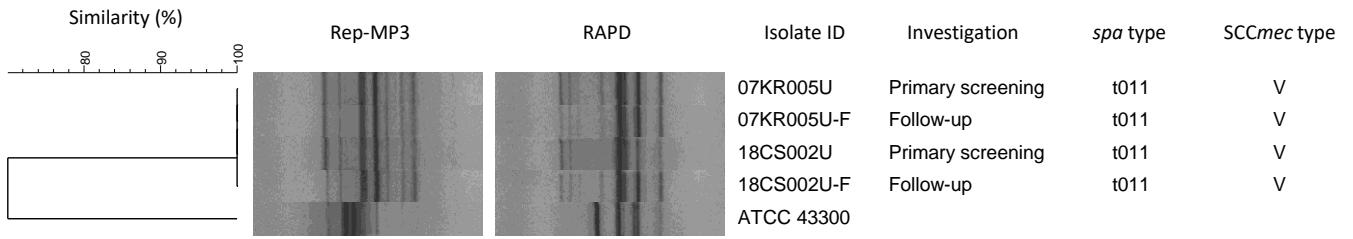

**Figure S2.** Rep-MP3 PCR and RAPD fingerprints of MRSA isolates obtained from the follow-up investigation of farm workers. The dendrogram was generated with BioNumerics (Applied Maths) using the unweighted pair-group method with arithmetic averages (UPGMA) and the Dice coefficient.
