# Supplementary material for: Unidirectional animal-to-human transmission of methicillin-resistant Staphylococcus aureus ST398 in pig farming; evidence from a surveillance study in southern Italy
Source: Springer Nature journal article supplement (doi:10.1186/s13756-019-0650-z), 2019-11-21
Supplement: MOESM2 [file 17416058]

**Table S2.** Resistance to individual antimicrobials in MRSA isolates obtained from 19 farm workers and 107 pigs

| Antimicrobial target    | Antimicrobial class        | Antimicrobial <sup>a</sup> | No. of non-susceptible (R+I) isolates (%) <sup>b</sup> |           |
|-------------------------|----------------------------|----------------------------|--------------------------------------------------------|-----------|
|                         |                            |                            | Farm workers                                           | Swine     |
| Peptidoglycan synthesis | β-lactams                  | PEN                        | 19 (100)                                               | 107 (100) |
|                         |                            | OXA                        | 19 (100)                                               | 107 (100) |
|                         | Glycopeptides              | VAN                        | 0 (0)                                                  | 0 (0)     |
| DNA synthesis           | Fluoroquinolones           | ENR                        | 15 (78.9)                                              | 76 (71.0) |
|                         |                            | MAR                        | 12 (63.2)                                              | 59 (55.1) |
| Protein synthesis       | Aminoglycosides            | GEN                        | 5 (26.3)                                               | 42 (39.3) |
|                         |                            | KAN                        | 7 (36.8)                                               | 44 (41.1) |
|                         | Macrolides                 | ERY                        | 11 (57.9)                                              | 70 (65.4) |
|                         | Lincosamides               | CLI                        | 14 (73.7)                                              | 96 (89.7) |
|                         | Tetracyclines              | TET                        | 19 (100)                                               | 107 (100) |
|                         | Fucidanes                  | FUS                        | 0 (0)                                                  | 0 (0)     |
|                         | Phenicols                  | CHL                        | 3 (15.8)                                               | 12 (11.2) |
|                         | Ansamycins                 | RIF                        | 1 (5.3)                                                | 1 (0.9)   |
| Others                  | Nitrofuranes               | NIT                        | 3 (15.8)                                               | 4 (3.7)   |
|                         | Folate pathways inhibitors | SXT                        | 17 (89.5)                                              | 74 (69.2) |

<sup>a</sup> PEN, penicillin; OXA, oxacillin; VAN; vancomycin; ENR, enrofloxacin; MAR, marbofloxacin; GEN, gentamycin; KAN, kanamycin; ERY, erythromycin; CLI, clindamycin; TET, tetracycline; FUS, fusidic acid; CHL, chloramphenicol; RIF, rifampicin; NIT, nitrofurantoin; SXT, trimethoprim-sulfamethoxazole.

<sup>b</sup> Isolates showing resistance (R) and intermediate susceptibility (I) were classified as non-susceptible.
