# Supplementary material for: Unidirectional animal-to-human transmission of methicillin-resistant Staphylococcus aureus ST398 in pig farming; evidence from a surveillance study in southern Italy
Source: Springer Nature journal article supplement (doi:10.1186/s13756-019-0650-z), 2019-11-21
Supplement: MOESM3 [file 17416058]

Similarity (%)

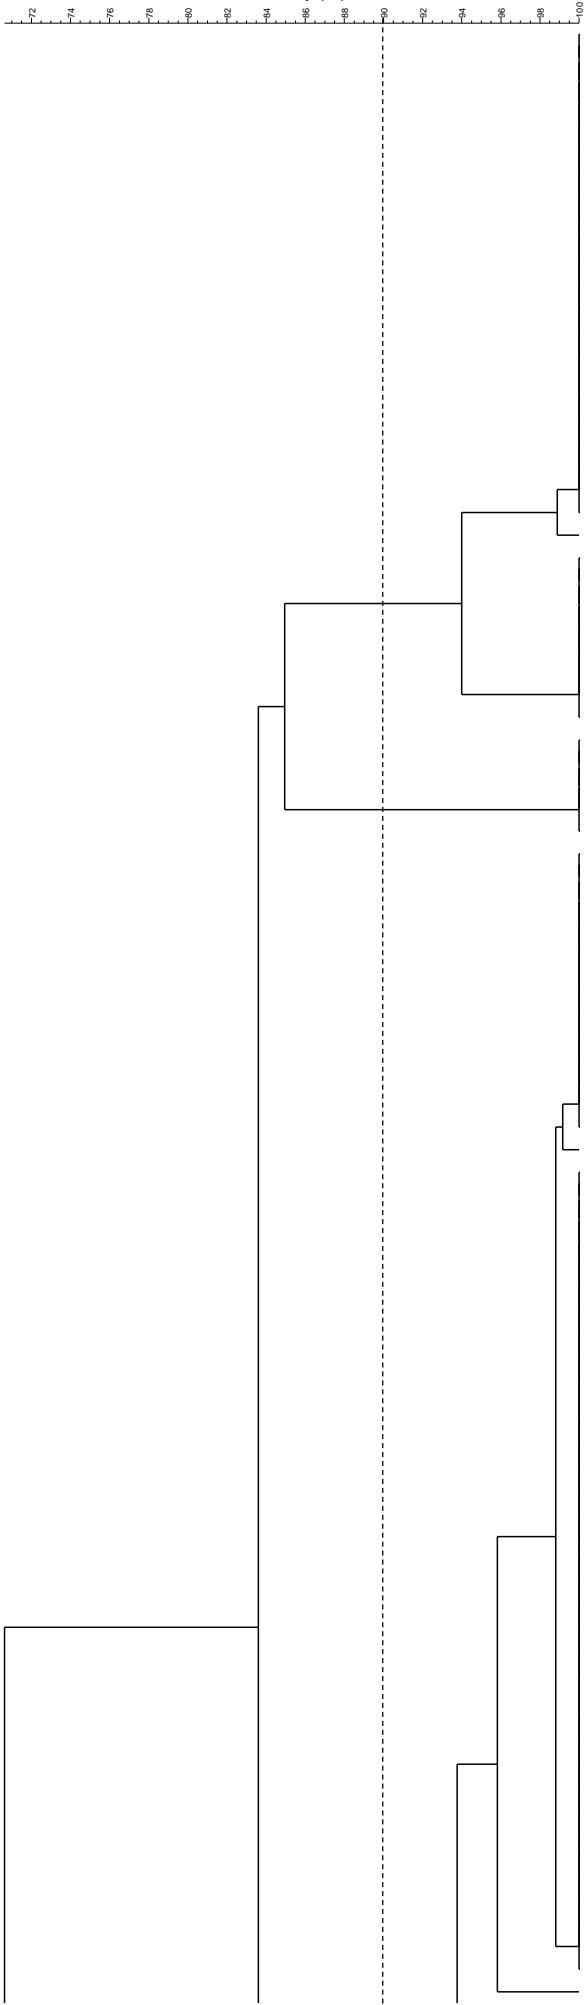

| Isolate ID | Farm ID | Source | <i>spa</i> type | SCC <i>mec</i> type | Rep-PCRcluster |
|------------|---------|--------|-----------------|---------------------|----------------|
| 01CZ001M   | 01CZ    | Swine  | t011            | V                   | A              |
| 01CZ002M   | 01CZ    | Swine  | t011            | V                   |                |
| 01CZ003M   | 01CZ    | Swine  | t011            | V                   |                |
| 01CZ003U   | 01CZ    | Human  | t011            | V                   |                |
| 01CZ004M   | 01CZ    | Swine  | t011            | V                   |                |
| 01CZ005M   | 01CZ    | Swine  | t011            | V                   |                |
| 01CZ006M   | 01CZ    | Swine  | t011            | V                   |                |
| 01CZ007M   | 01CZ    | Swine  | t011            | V                   |                |
| 01CZ009M   | 01CZ    | Swine  | t011            | V                   |                |
| 01CZ011M   | 01CZ    | Swine  | t011            | V                   |                |
| 03CZ010M   | 03CZ    | Swine  | t034            | V                   |                |
| 07KR010M   | 07KR    | Swine  | t011            | V                   |                |
| 07KR012M   | 07KR    | Swine  | t011            | V                   |                |
| 07KR013M   | 07KR    | Swine  | t011            | V                   |                |
| 07KR014M   | 07KR    | Swine  | t011            | V                   |                |
| 07KR015M   | 07KR    | Swine  | t011            | V                   |                |
| 07KR018M   | 07KR    | Swine  | t011            | V                   |                |
| 07KR019M   | 07KR    | Swine  | t011            | V                   |                |
| 29RC002U   | 29RC    | Human  | t034            | V                   |                |
| 29RC003U   | 29RC    | Human  | t034            | V                   |                |
| 29RC009M   | 29RC    | Swine  | t034            | V                   |                |
| 29RC010M   | 29RC    | Swine  | t034            | V                   |                |
| • 32RC001U | 32RC    | Human  | t034            | V                   |                |
| 05CS001M   | 05CS    | Swine  | t011            | V                   |                |
| 05CS008M   | 05CS    | Swine  | t011            | V                   |                |
| 05CS009M   | 05CS    | Swine  | t011            | V                   |                |
| 05CS010M   | 05CS    | Swine  | t011            | V                   |                |
| 05CS012M   | 05CS    | Swine  | t011            | V                   |                |
| 05CS013M   | 05CS    | Swine  | t011            | V                   |                |
| 05CS019M   | 05CS    | Swine  | t011            | V                   |                |
| 05CS020M   | 05CS    | Swine  | t011            | V                   |                |
| 19RC001U   | 19RC    | Human  | t034            | V                   |                |
| 19RC002U   | 19RC    | Human  | t034            | V                   |                |
| 19RC007M   | 19RC    | Swine  | t1793           | V                   |                |
| 19RC013M   | 19RC    | Swine  | t034            | V                   |                |
| 19RC017M   | 19RC    | Swine  | t1793           | V                   |                |
| 05CS011M   | 05CS    | Swine  | t1606           | V                   |                |
| 18CS010M   | 18CS    | Swine  | t011            | V                   |                |
| 05CS027M   | 05CS    | Swine  | t1606           | V                   |                |
| 07KR001M   | 07KR    | Swine  | t011            | V                   |                |
| 07KR002M   | 07KR    | Swine  | t011            | V                   |                |
| 07KR003M   | 07KR    | Swine  | t011            | V                   |                |
| 07KR005U   | 07KR    | Human  | t011            | V                   |                |
| 07KR006M   | 07KR    | Swine  | t011            | V                   |                |
| 18CS001M   | 18CS    | Swine  | t1184           | V                   |                |
| 18CS002M   | 18CS    | Swine  | t011            | V                   |                |
| 18CS004M   | 18CS    | Swine  | t011            | V                   |                |
| 18CS005M   | 18CS    | Swine  | t011            | V                   |                |
| 18CS008M   | 18CS    | Swine  | t011            | V                   |                |
| 18CS006M   | 18CS    | Swine  | t1184           | V                   |                |
| • 01CZ001U | 01CZ    | Human  | t011            | V                   |                |
| 02CZ001M   | 02CZ    | Swine  | t108            | V                   |                |
| 02CZ001U   | 02CZ    | Human  | t108            | V                   |                |
| 02CZ002M   | 02CZ    | Swine  | t108            | V                   |                |
| 02CZ003M   | 02CZ    | Swine  | t034            | V                   |                |
| 02CZ003U   | 02CZ    | Human  | t899            | IVc                 |                |
| 02CZ005M   | 02CZ    | Swine  | t034            | V                   |                |
| 02CZ006M   | 02CZ    | Swine  | t034            | V                   |                |
| 02CZ007M   | 02CZ    | Swine  | t034            | V                   |                |
| 02CZ008M   | 02CZ    | Swine  | t108            | V                   |                |
| 02CZ010M   | 02CZ    | Swine  | t899            | IVc                 |                |
| 05CS002M   | 05CS    | Swine  | t1606           | V                   |                |
| 05CS003M   | 05CS    | Swine  | t1606           | V                   |                |
| 05CS003U   | 05CS    | Human  | t1606           | V                   |                |
| 05CS004M   | 05CS    | Swine  | t5524           | V                   |                |
| 05CS004U   | 05CS    | Human  | t011            | V                   |                |
| 05CS006M   | 05CS    | Swine  | t1606           | V                   |                |
| 05CS014M   | 05CS    | Swine  | t1606           | V                   |                |
| 05CS015M   | 05CS    | Swine  | t1606           | V                   |                |
| 05CS016M   | 05CS    | Swine  | t011            | V                   |                |
| 05CS021M   | 05CS    | Swine  | t1606           | V                   |                |
| 05CS023M   | 05CS    | Swine  | t1606           | V                   |                |
| 05CS024M   | 05CS    | Swine  | t011            | V                   |                |
| 05CS025M   | 05CS    | Swine  | t1606           | V                   |                |
| 05CS026M   | 05CS    | Swine  | t1606           | V                   |                |
| 05CS029M   | 05CS    | Swine  | t1606           | V                   |                |
| 05CS030M   | 05CS    | Swine  | t1606           | V                   |                |
| 07KR004M   | 07KR    | Swine  | t011            | V                   |                |
| 07KR007M   | 07KR    | Swine  | t011            | V                   |                |
| 07KR008M   | 07KR    | Swine  | t011            | V                   |                |
| 07KR009M   | 07KR    | Swine  | t011            | V                   |                |
| 07KR011M   | 07KR    | Swine  | t011            | V                   |                |
| 07KR016M   | 07KR    | Swine  | t011            | V                   |                |
| 18CS001U   | 18CS    | Human  | t034            | V                   |                |
| 18CS002U   | 18CS    | Human  | t011            | V                   |                |
| 18CS003U   | 18CS    | Human  | t011            | V                   |                |
| 07KR017M   | 07KR    | Swine  | t011            | V                   |                |

A

B

C

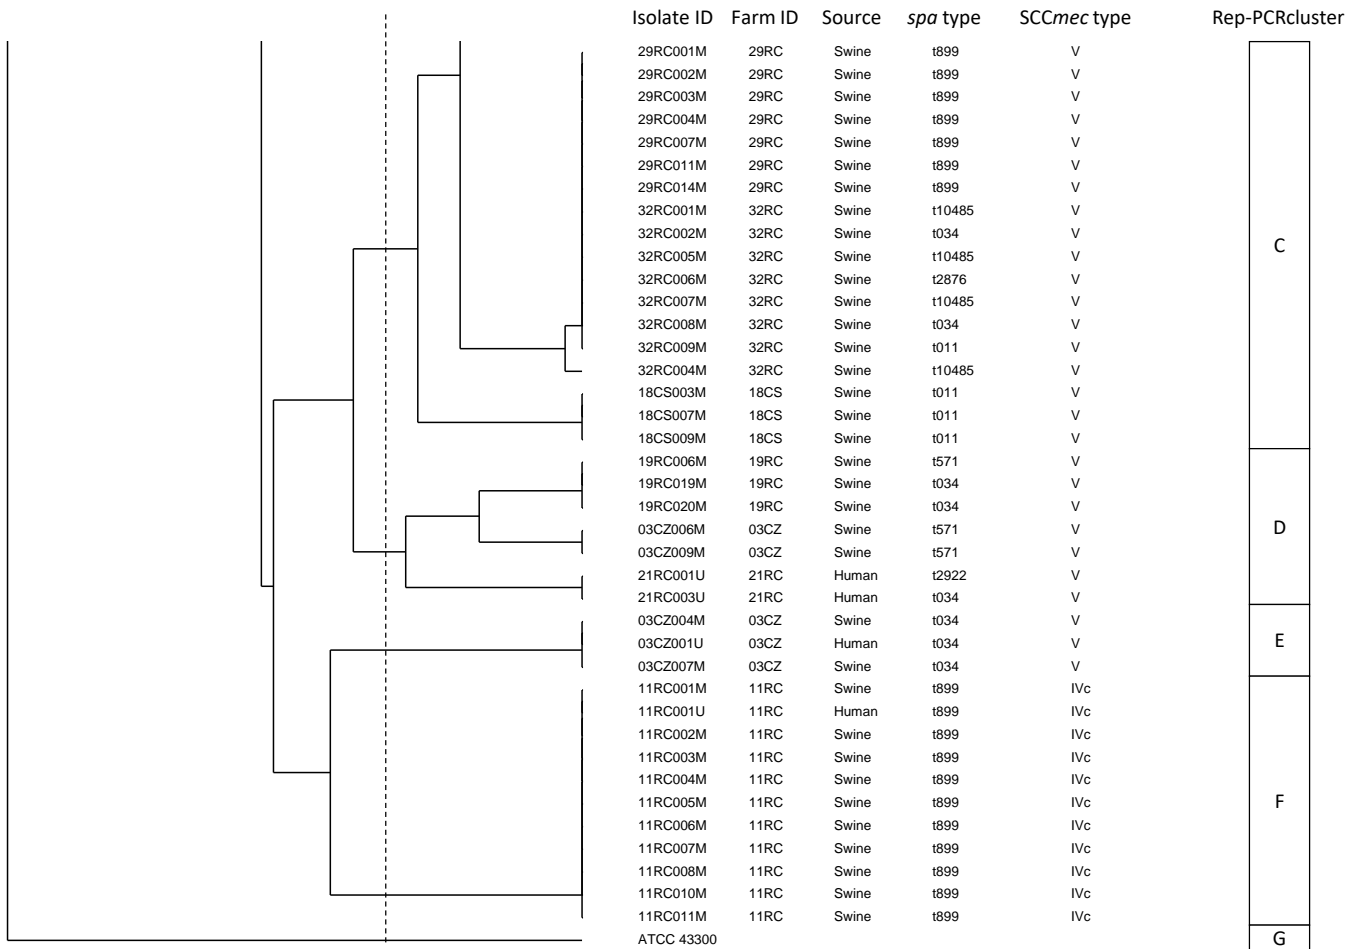

**Figure S1.** Rep-MP3 PCR analysis of MRSA isolates from workers (n=19) and swine (n=107). The dendrogram was generated with BioNumerics (Applied Maths) using the unweighted pair-group method with arithmetic averages (UPGMA) and the Dice coefficient. Boxes (A to F) denote clusters of isolates with a similar profile (>90% similarity). Human MRSA isolates (2/19) for which a correlation with swine isolates from the same farm has not been observed are marked with a black circle. *S. aureus* ATCC 43300 was included as outgroup for analysis.
